# Supplementary material
Source: publisher site journal article supplement (https://www.dovepress.com/article/491278)
Supplement: Supplementary file 1 [file 04_Jan_2025_491278-Revised-supplementary-naterials.docx]

**Supplement table 1 of 3-Acetyl-11-keto-beta-boswellic acid:**

| Metabolite  Name | 3-Acetyl-11-keto-beta-boswellic acid |
| --- | --- |
| Smile | CC1CCC2(CCC3(C(=CC(=O)C4C3(CCC5C4(CCC(C5(C)C(=O)O)OC(=O)C)C)C)C2C1C)C)C |
| 2D Structure |  |

| Activity | Pa | Pi |
| --- | --- | --- |
| Hepatoprotectant | 0.939 | 0.002 |
| Lipid metabolism regulator | 0.936 | 0.003 |
| Chemopreventive | 0.920 | 0.002 |
| Oxidoreductase inhibitor | 0.920 | 0.002 |
| Hypolipemic | 0.906 | 0.004 |
| Antiinflammatory | 0.894 | 0.004 |
| Antisecretoric | 0.890 | 0.003 |
| Antineoplastic | 0.869 | 0.005 |
| Apoptosis agonist | 0.860 | 0.005 |
| Antiulcerative | 0.851 | 0.003 |
| Mucomembranous protector | 0.844 | 0.010 |
| Antiprotozoal (Leishmania) | 0.796 | 0.005 |
| Testosterone 17beta-dehydrogenase (NADP+) inhibitor | 0.794 | 0.027 |
| Transcription factor stimulant | 0.763 | 0.003 |
| Transcription factor NF kappa B stimulant | 0.763 | 0.003 |
| Nootropic | 0.778 | 0.021 |
| Nitric oxide antagonist | 0.755 | 0.003 |
| Hepatic disorders treatment | 0.752 | 0.004 |
| AR expression inhibitor | 0.731 | 0.004 |
| Wound healing agent | 0.717 | 0.004 |

**Supplement table 2 of 3-Acetyl-beta-boswellic acid:**

| Metabolite Name | 3-Acetyl-beta-boswellic acid |
| --- | --- |
| Smile | CC1CCC2(CCC3(C(=CCC4C3(CCC5C4(CCC(C5(C)C(=O)O)OC(=O)C)C)C)C2C1C)C)C |
| 2D Structure |  |

| Activity | Pa | Pi |
| --- | --- | --- |
| Hepatoprotectant | 0.943 | 0.002 |
| Hypolipemic | 0.925 | 0.004 |
| Chemopreventive | 0.908 | 0.002 |
| Mucomembranous protector | 0.909 | 0.004 |
| Oxidoreductase inhibitor | 0.903 | 0.002 |
| Antiinflammatory | 0.899 | 0.004 |
| Apoptosis agonist | 0.898 | 0.004 |
| Lipid metabolism regulator | 0.884 | 0.004 |
| Antineoplastic | 0.875 | 0.005 |
| Antiprotozoal (Leishmania) | 0.860 | 0.004 |
| Antiulcerative | 0.836 | 0.003 |
| Antisecretoric | 0.835 | 0.004 |
| Nootropic | 0.841 | 0.011 |
| Membrane integrity antagonist | 0.806 | 0.006 |
| Hepatic disorders treatment | 0.790 | 0.004 |
| Transcription factor stimulant | 0.785 | 0.003 |
| Transcription factor NF kappa B stimulant | 0.785 | 0.003 |
| Lipid peroxidase inhibitor | 0.782 | 0.004 |
| Wound healing agent | 0.764 | 0.003 |
| Nitric oxide antagonist | 0.757 | 0.003 |
| Gastrin inhibitor | 0.746 | 0.003 |
| Caspase 8 stimulant | 0.739 | 0.003 |
| Antiviral (Influenza) | 0.740 | 0.004 |
| Transcription factor NF kappa B inhibitor | 0.628 | 0.002 |
| Alkenylglycerophosphocholine hydrolase inhibitor | 0.741 | 0.026 |
| HMOX1 expression enhancer | 0.718 | 0.006 |
| Insulin promoter | 0.713 | 0.005 |
| Antinociceptive | 0.704 | 0.004 |
| Testosterone 17beta-dehydrogenase (NADP+) inhibitor | 0.730 | 0.045 |

**Supplement table 3 of Acetyl-11-keto-beta-boswellic acid:**

| Metabolite  Name | Acetyl-11-keto-beta-boswellic acid |
| --- | --- |
| Smile | CC1CCC2(CCC3(C(=CC(=O)C4C3(CCC5C4(CCC(C5(C)C(=O)O)OC(=O)C)C)C)C2C1C)C)C |
| 2D Structure |  |

| Activity | Pa | Pi |
| --- | --- | --- |
| Hepatoprotectant | 0,939 | 0,002 |
| Lipid metabolism regulator | 0,936 | 0,003 |
| Lipid metabolism regulator | 0,936 | 0,003 |
| Chemopreventive | 0,920 | 0,002 |
| Oxidoreductase inhibitor | 0,920 | 0,002 |
| Hypolipemic | 0,906 | 0,004 |
| Antiinflammatory | 0,894 | 0,004 |
| Antisecretoric | 0,890 | 0,003 |
| Antineoplastic | 0,869 | 0,005 |
| Apoptosis agonist | 0,860 | 0,005 |
| Antiulcerative | 0,851 | 0,003 |
| Mucomembranous protector | 0,844 | 0,010 |
| Antiprotozoal (Leishmania) | 0,796 | 0,005 |
| Testosterone 17beta-dehydrogenase (NADP+) inhibitor | 0,794 | 0,027 |
| Transcription factor stimulant | 0,763 | 0,003 |
| Transcription factor NF kappa B stimulant | 0,763 | 0,003 |
| Nootropic | 0,778 | 0,021 |
| Nitric oxide antagonist | 0,755 | 0,003 |
| Hepatic disorders treatment | 0,752 | 0,004 |
| AR expression inhibitor | 0,731 | 0,004 |
| Wound healing agent | 0,717 | 0,004 |

| Metabolite  Name | 3alpha-Acetoxy-27-hydroxylup-20(29)-en-24-oic acid: |
| --- | --- |
| Smile | CC(=C)C1CCC2(C1C3CCC4C5(CCC(C(C5CCC4(C3(CC2)CO)C)(C)C(=O)O)OC(=O)C)C)C |
| 2D Structure |  |

**Supplement table 4 of 3alpha-Acetoxy-27-hydroxylup-20(29)-en-24-oic acid:**

| Activity | Pa | Pi |
| --- | --- | --- |
| Hepatoprotectant | 0.947 | 0.002 |
| Antineoplastic | 0.936 | 0.004 |
| Transcription factor NF kappa B stimulant | 0.873 | 0.002 |
| Transcription factor stimulant | 0.873 | 0.002 |
| Apoptosis agonist | 0.854 | 0.005 |
| Antineoplastic (colorectal cancer) | 0.848 | 0.004 |
| Antineoplastic (colon cancer) | 0.844 | 0.004 |
| Antiprotozoal (Leishmania) | 0.835 | 0.004 |
| Antineoplastic (lung cancer) | 0.834 | 0.004 |
| Oxidoreductase inhibitor | 0.824 | 0.005 |
| Caspase 8 stimulant | 0.818 | 0.002 |
| Caspase 3 stimulant | 0.809 | 0.005 |
| Chemopreventive | 0.776 | 0.004 |
| Alkenylglycerophosphocholine hydrolase inhibitor | 0.788 | 0.019 |
| Antiinflammatory | 0.760 | 0.009 |
| Mucomembranous protector | 0.774 | 0.026 |
| Antineoplastic (melanoma) | 0.740 | 0.004 |
| Beta glucuronidase inhibitor | 0.729 | 0.004 |
| Antieczematic | 0.754 | 0.029 |
| Immunosuppressant | 0.732 | 0.013 |
| Hypolipemic | 0.713 | 0.012 |

**Supplement table 5 of 3-Oxotirucalla-7,24-dien-21-oic acid:**

| Metabolite Name | 3-Oxotirucalla-7,24-dien-21-oic acid |
| --- | --- |
| Smile | CC(=CCCC(C1CCC2(C1(CCC3C2=CCC4C3(CCC(=O)C4(C)C)C)C)C)C(=O)O)C |
| 2D Structure |  |

| Activity | Pa | Pi |
| --- | --- | --- |
| Chemopreventive | 0.890 | 0.003 |
| Hepatoprotectant | 0.876 | 0.003 |
| Oxidoreductase inhibitor | 0.876 | 0.003 |
| Antihypercholesterolemic | 0.860 | 0.004 |
| Apoptosis agonist | 0.860 | 0.005 |
| Mucomembranous protector | 0.856 | 0.008 |
| Antiinflammatory | 0.844 | 0.005 |
| Lipid metabolism regulator | 0.841 | 0.005 |
| Transcription factor stimulant | 0.833 | 0.002 |
| Transcription factor NF kappa B stimulant | 0.833 | 0.002 |
| Cholesterol antagonist | 0.812 | 0.004 |
| CYP2J substrate | 0.821 | 0.016 |
| Hypolipemic | 0.799 | 0.007 |
| Antieczematic | 0.802 | 0.018 |
| Antineoplastic | 0.785 | 0.014 |
| Antisecretoric | 0.758 | 0.005 |
| Vitamin-K-epoxide reductase (warfarin-insensitive) inhibitor | 0.747 | 0.003 |
| Antiviral (Influenza) | 0.747 | 0.004 |
| Immunosuppressant | 0.745 | 0.012 |
| Acylcarnitine hydrolase inhibitor | 0.752 | 0.019 |
| Caspase 3 stimulant | 0.732 | 0.009 |
| UGT1A substrate | 0.719 | 0.008 |
| Cholesterol synthesis inhibitor | 0.709 | 0.001 |
| Alkenylglycerophosphocholine hydrolase inhibitor | 0.733 | 0.027 |
| UDP-glucuronosyltransferase substrate | 0.716 | 0.013 |
| Alkylacetylglycerophosphatase inhibitor | 0.705 | 0.019 |

**Supplement table 6 of Boswellic Acid:**

| Metabolite  Name | Boswellic Acid |
| --- | --- |
| Smile | CC1CCC2(CCC3(C(=CCC4C3(CCC5C4(CCC(C5(C)C(=O)O)O)C)C)C2C1C)C)C |
| 2D Structure |  |

| Activity | Pa | Pi |
| --- | --- | --- |
| Hepatoprotectant | 0.932 | 0.002 |
| Hypolipemic | 0.910 | 0.004 |
| Apoptosis agonist | 0.907 | 0.004 |
| Antiinflammatory | 0.897 | 0.004 |
| Insulin promoter | 0.894 | 0.003 |
| Oxidoreductase inhibitor | 0.892 | 0.002 |
| Chemopreventive | 0.882 | 0.003 |
| Antineoplastic | 0.859 | 0.006 |
| Testosterone 17beta-dehydrogenase (NADP+) inhibitor | 0.863 | 0.012 |
| Transcription factor NF kappa B stimulant | 0.853 | 0.002 |
| Transcription factor stimulant | 0.853 | 0.002 |
| Mucomembranous protector | 0.857 | 0.008 |
| Alkenylglycerophosphocholine hydrolase inhibitor | 0.846 | 0.012 |
| Hepatic disorders treatment | 0.827 | 0.004 |
| Antiulcerative | 0.823 | 0.003 |
| Antiviral (Influenza) | 0.803 | 0.003 |
| Lipid peroxidase inhibitor | 0.794 | 0.004 |
| Nitric oxide antagonist | 0.776 | 0.003 |
| Antiprotozoal (Leishmania) | 0.773 | 0.006 |
| Wound healing agent | 0.761 | 0.003 |
| Nootropic | 0.777 | 0.022 |
| Caspase 8 stimulant | 0.744 | 0.003 |
| Membrane integrity antagonist | 0.750 | 0.010 |
| Antisecretoric | 0.745 | 0.006 |
| DNA ligase (ATP) inhibitor | 0.738 | 0.001 |
| Antinociceptive | 0.737 | 0.003 |
| Acylcarnitine hydrolase inhibitor | 0.748 | 0.019 |
| Phosphatase inhibitor | 0.735 | 0.007 |
| Caspase 3 stimulant | 0.725 | 0.010 |
| Gastrin inhibitor | 0.715 | 0.004 |
| HMOX1 expression enhancer | 0.707 | 0.007 |
| Alkylacetylglycerophosphatase inhibitor | 0.717 | 0.018 |
| Antieczematic | 0.727 | 0.037 |
| CYP2J substrate | 0.713 | 0.046 |

**Supplement table 7 of Ursodeoxycholic acid:**

| Metabolite  Name | Ursodeoxycholi**c** |
| --- | --- |
| Smile | CC(CCC(=O)O)C1CCC2C1(CCC3C2C(CC4C3(CCC(C4)O)C)O)C |
| 2D Structure |  |

| Activity | Pa | Pi |
| --- | --- | --- |
| Acylcarnitine hydrolase inhibitor | 0,997 | 0,000 |
| Alkylacetylglycerophosphatase inhibitor | 0,992 | 0,000 |
| Alkenylglycerophosphocholine hydrolase inhibitor | 0,991 | 0,000 |
| UGT1A8 substrate | 0,984 | 0,001 |
| Dextranase inhibitor | 0,983 | 0,001 |
| UGT1A10 substrate | 0,982 | 0,001 |
| D-lactaldehyde dehydrogenase inhibitor | 0,981 | 0,001 |
| Glucan endo-1,3-beta-D-glucosidase inhibitor | 0,979 | 0,001 |
| UGT1A substrate | 0,980 | 0,002 |
| Choleretic | 0,976 | 0,001 |
| Peptidoglycan glycosyltransferase inhibitor | 0,975 | 0,000 |
| Vitamin-K-epoxide reductase (warfarin-insensitive) inhibitor | 0,971 | 0,000 |
| Protein-disulfide reductase (glutathione) inhibitor | 0,971 | 0,001 |
| Phospholipase C inhibitor | 0,970 | 0,001 |
| Flavin-containing monooxygenase inhibitor | 0,970 | 0,000 |
| Prostaglandin-E2 9-reductase inhibitor | 0,970 | 0,002 |
| Alkenylglycerophosphoethanolamine hydrolase inhibitor | 0,969 | 0,001 |
| Linoleate diol synthase inhibitor | 0,966 | 0,001 |
| Sulfite dehydrogenase inhibitor | 0,965 | 0,001 |
| UDP-glucuronosyltransferase substrate | 0,964 | 0,002 |
| N-(long-chain-acyl) ethanolamine deacylase inhibitor | 0,960 | 0,000 |
| Cholesterol antagonist | 0,958 | 0,001 |
| CYP4B substrate | 0,956 | 0,001 |
| UGT1A4 substrate | 0,956 | 0,001 |
| Plasmanylethanolamine desaturase inhibitor | 0,954 | 0,000 |
| Choloylglycine hydrolase inhibitor | 0,954 | 0,000 |
| Thiosulfate dehydrogenase inhibitor | 0,954 | 0,001 |
| CYP4B1 substrate | 0,953 | 0,001 |
| Cholestanetriol 26-monooxygenase inhibitor | 0,951 | 0,001 |
| Retinol O-fatty-acyltransferase inhibitor | 0,949 | 0,000 |
| Phosphoinositide 5-phosphatase inhibitor | 0,949 | 0,001 |
| Lipoprotein lipase inhibitor | 0,947 | 0,002 |
| UGT2B1 substrate | 0,942 | 0,001 |
| Morphine 6-dehydrogenase inhibitor | 0,939 | 0,001 |
| UGT2B substrate | 0,939 | 0,001 |
| Adenomatous polyposis treatment | 0,937 | 0,000 |
| Protein-Npi-phosphohistidine-sugar phosphotransferase inhibitor | 0,937 | 0,001 |
| 2-Acylglycerol O-acyltransferase inhibitor | 0,933 | 0,001 |
| CYP4A11 substrate | 0,931 | 0,001 |
| Phosphatidate phosphatase inhibitor | 0,930 | 0,002 |
| Bile-salt sulfotransferase inhibitor | 0,927 | 0,000 |
| Trans-1,2-dihydrobenzene-1,2-diol dehydrogenase inhibitor | 0,927 | 0,001 |
| Hydroxylamine reductase (NADH) inhibitor | 0,927 | 0,001 |
| UGT1A6 substrate | 0,927 | 0,002 |
| CYP2C substrate | 0,928 | 0,004 |
| Threonine ammonia-lyase inhibitor | 0,921 | 0,000 |
| Glyceryl-ether monooxygenase inhibitor | 0,922 | 0,002 |
| Acetylgalactosaminyl-O-glycosyl-glycoprotein beta-1,3-N-acetylglucosaminyltransferase inhibitor | 0,917 | 0,000 |
| Antihypercholesterolemic | 0,917 | 0,003 |
| CYP2B6 substrate | 0,917 | 0,003 |
| UGT1A1 substrate | 0,915 | 0,002 |
| UGT1A3 substrate | 0,914 | 0,002 |
| Anesthetic general | 0,914 | 0,003 |
| Cholate-CoA ligase inhibitor | 0,910 | 0,000 |
| Hypolipemic | 0,913 | 0,004 |
| Hepatoprotectant | 0,908 | 0,002 |
| Aldehyde dehydrogenase (NADP+) inhibitor | 0,907 | 0,001 |
| Alkylglycerophosphoethanolamine phosphodiesterase inhibitor | 0,900 | 0,000 |
| CYP2J substrate | 0,898 | 0,005 |
| Cytoprotectant | 0,892 | 0,001 |
| UGT2B4 substrate | 0,888 | 0,001 |
| Coproporphyrinogen oxidase inhibitor | 0,888 | 0,001 |
| CYP2J2 substrate | 0,889 | 0,004 |
| Antieczematic | 0,888 | 0,005 |
| Erythropoiesis stimulant | 0,883 | 0,001 |
| CYP3A4 substrate | 0,885 | 0,007 |
| UGT2B7 substrate | 0,873 | 0,001 |
| CYP7 inhibitor | 0,871 | 0,000 |
| Long-chain-fatty-acid-CoA ligase inhibitor | 0,866 | 0,001 |
| CYP3A4 inducer | 0,869 | 0,004 |
| CYP3A substrate | 0,870 | 0,008 |
| Testosterone 17beta-dehydrogenase (NADP+) inhibitor | 0,872 | 0,010 |
| Laxative | 0,862 | 0,001 |
| Thiamine-triphosphatase inhibitor | 0,858 | 0,002 |
| Phosphatidylinositol diacylglycerol-lyase inhibitor | 0,858 | 0,001 |
| Cholesterol oxidase inhibitor | 0,851 | 0,000 |
| Beta-carotene 15,15'-monooxygenase inhibitor | 0,851 | 0,002 |
| Respiratory analeptic | 0,852 | 0,005 |
| CYP3A inducer | 0,849 | 0,004 |
| Rubredoxin-NAD+ reductase inhibitor | 0,846 | 0,002 |
| Analeptic | 0,834 | 0,004 |
| Membrane integrity antagonist | 0,832 | 0,005 |
| Oxidoreductase inhibitor | 0,824 | 0,005 |
| Biliary tract disorders treatment | 0,822 | 0,003 |
| CYP3A2 substrate | 0,822 | 0,004 |
| Inorganic diphosphatase inhibitor | 0,818 | 0,001 |
| Signal peptidase I inhibitor | 0,813 | 0,000 |
| Apyrase inhibitor | 0,813 | 0,002 |
| CYP2C19 substrate | 0,814 | 0,004 |
| Proliferative diseases treatment | 0,810 | 0,003 |
| Glycerol-3-phosphate O-acyltransferase inhibitor | 0,801 | 0,001 |
| Dolichyl-diphosphooligosaccharide-protein glycotransferase inhibitor | 0,803 | 0,002 |
| 4-Hydroxybenzoate nonaprenyltransferase inhibitor | 0,801 | 0,002 |
| Alcohol dehydrogenase [NAD(P)+] inhibitor | 0,799 | 0,001 |
| Glycerone-phosphate O-acyltransferase inhibitor | 0,798 | 0,000 |
| Beta-adrenergic receptor kinase inhibitor | 0,806 | 0,012 |
| G-protein-coupled receptor kinase inhibitor | 0,806 | 0,012 |
| Cytochrome-b5 reductase inhibitor | 0,795 | 0,003 |
| Phosphatidate cytidylyltransferase inhibitor | 0,792 | 0,001 |
| Membrane permeability inhibitor | 0,796 | 0,010 |
| Arylamine N-acetyltransferase inhibitor | 0,787 | 0,001 |
| Bilirubin oxidase inhibitor | 0,788 | 0,003 |
| CYP2C11 substrate | 0,777 | 0,004 |
| Antipruritic | 0,775 | 0,004 |
| Caspase 3 stimulant | 0,774 | 0,007 |
| Hepatic disorders treatment | 0,769 | 0,004 |
| Dermatologic | 0,769 | 0,005 |
| Glycerol-3-phosphate dehydrogenase inhibitor | 0,766 | 0,002 |
| CYP2C9 inducer | 0,760 | 0,003 |
| Diacylglycerol cholinephosphotransferase inhibitor | 0,753 | 0,001 |
| Immunosuppressant | 0,759 | 0,010 |
| CYP2B substrate | 0,749 | 0,009 |
| DELTA14-sterol reductase inhibitor | 0,737 | 0,003 |
| CYP3A5 substrate | 0,743 | 0,011 |
| Antiviral (Influenza) | 0,737 | 0,004 |
| Mucomembranous protector | 0,759 | 0,031 |
| Beta-glucosidase inhibitor | 0,726 | 0,001 |
| CMP-N-acetylneuraminate monooxygenase inhibitor | 0,720 | 0,001 |
| CYP4A substrate | 0,714 | 0,003 |
| Antipsoriatic | 0,714 | 0,005 |
| Chemopreventive | 0,716 | 0,006 |
| 1-Acylglycerol-3-phosphate O-acyltransferase inhibitor | 0,712 | 0,004 |
| Pregnane X receptor agonist | 0,707 | 0,000 |
| CYP3A1 substrate | 0,713 | 0,009 |
| Antiseborrheic | 0,724 | 0,033 |

**Supplement table 8 of Trans-4‘,5-dihydroxy-3-methoxystilbene-5-O-[α-l-rhamnopyranosyl-(1→6)]-β-d-glucopyranoside:**

| Name Molecule | Trans-4‘,5-dihydroxy-3-methoxystilbene-5-O-[α-l-rhamnopyranosyl-(1→6)]-β-d-glucopyranoside |
| --- | --- |
| Smile |  |
| 2D Structure |  |

| Activity | Pa | Pi |
| --- | --- | --- |
| Vasoprotector | 0,940 | 0,002 |
| Membrane permeability inhibitor | 0,940 | 0,003 |
| Membrane integrity agonist Membrane integrity agonist | 0,917 | 0,007 |
| CDP-glycerol glycerophosphotransferase inhibitor | 0,915 | 0,007 |
| Anaphylatoxin receptor antagonist | 0,865 | 0,006 |
| Benzoate-CoA ligase inhibitor | 0,865 | 0,009 |
| UDP-glucuronosyltransferase substrate | 0,860 | 0,004 |
| Free radical scavenger | 0,848 | 0,002 |
| Antineoplastic | 0,835 | 0,008 |
| Lactase inhibitor | 0,828 | 0,003 |
| Alkenylglycerophosphocholine hydrolase inhibitor | 0,837 | 0,013 |
| Anticarcinogenic | 0,823 | 0,004 |
| Lipid peroxidase inhibitor | 0,812 | 0,003 |
| Hepatoprotectant | 0,798 | 0,004 |
| Antihypercholesterolemic | 0,796 | 0,005 |
| Dolichyl-phosphate beta-glucosyltransferase inhibitor | 0,786 | 0,001 |
| Chemopreventive | 0,784 | 0,004 |
| CYP2H substrate | 0,789 | 0,019 |
| Alpha glucosidase inhibitor | 0,767 | 0,001 |
| Beta glucuronidase inhibitor | 0,749 | 0,003 |
| ICAM1 expression inhibitor | 0,746 | 0,001 |
| Hemostatic | 0,735 | 0,003 |
| Mycothiol-S-conjugate amidase inhibitor | 0,736 | 0,004 |
| Antifungal | 0,739 | 0,008 |
| Antiprotozoal (Leishmania) | 0,735 | 0,008 |
| Proliferative diseases treatment | 0,727 | 0,005 |
| Caspase 8 stimulant | 0,721 | 0,003 |
| Sugar-phosphatase inhibitor | 0,743 | 0,025 |
| Antiinfective | 0,719 | 0,006 |
| Caspase 3 stimulant | 0,712 | 0,010 |
| HIF1A expression inhibitor | 0,713 | 0,019 |

**Supplement table 9 of Beta-Sitosterol:**

| Metabolite  Name | Beta-Sitosterol |
| --- | --- |
| Smile | CCC(CCC(C)C1CCC2C1(CCC3C2CC=C4C3(CCC(C4)O)C)C)C(C)C |
| 2D Structure |  |

| Activity | Pa | Pi |
| --- | --- | --- |
| DELTA14-sterol reductase inhibitor | 0,965 | 0,001 |
| Antihypercholesterolemic | 0,960 | 0,002 |
| Prostaglandin-E2 9-reductase inhibitor | 0,959 | 0,002 |
| Cholesterol antagonist | 0,957 | 0,001 |
| Alkenylglycerophosphocholine hydrolase inhibitor | 0,952 | 0,002 |
| Alkylacetylglycerophosphatase inhibitor | 0,945 | 0,002 |
| Acylcarnitine hydrolase inhibitor | 0,928 | 0,003 |
| Hypolipemic | 0,924 | 0,004 |
| Testosterone 17beta-dehydrogenase (NADP+) inhibitor | 0,924 | 0,004 |
| UGT1A4 | 0,917 | 0,001 |
| CYP2C substrate | 0,909 | 0,005 |
| UGT1A substrate | 0,903 | 0,003 |
| UGT2B substrate | 0,888 | 0,002 |
| UDP-glucuronosyltransferase substrate | 0,889 | 0,003 |
| UGT2B1 substrate | 0,886 | 0,002 |
| Oxidoreductase inhibitor | 0,886 | 0,003 |
| Anesthetic general | 0,881 | 0,004 |
| CYP3A4 substrate | 0,882 | 0,007 |
| CYP4B substrate | 0,869 | 0,001 |
| CYP3A4 inducer | 0,868 | 0,004 |
| CYP3A inducer | 0,866 | 0,004 |
| CYP4B1 substrate | 0,859 | 0,001 |
| Adenomatous polyposis treatment | 0,858 | 0,002 |
| CYP3A substrate | 0,865 | 0,008 |
| Dextranase inhibitor | 0,856 | 0,004 |
| Linoleate diol synthase inhibitor | 0,855 | 0,004 |
| CYP2C11 substrate | 0,848 | 0,003 |
| Respiratory analeptic | 0,849 | 0,006 |
| Cholestanetriol 26-monooxygenase inhibitor | 0,847 | 0,003 |
| Alkenylglycerophosphoethanolamine hydrolase inhibitor | 0,835 | 0,003 |
| Sulfotransferase substrate | 0,832 | 0,004 |
| Chemopreventive | 0,831 | 0,003 |
| Peroxidase substrate | 0,818 | 0,002 |
| CYP17 inhibitor | 0,816 | 0,002 |
| Hepatoprotectant | 0,815 | 0,004 |
| CYP2J substrate | 0,824 | 0,015 |
| Caspase 3 stimulant | 0,806 | 0,005 |
| Proliferative diseases treatment | 0,804 | 0,003 |
| 27-Hydroxycholesterol 7alpha-monooxygenase inhibitor | 0,804 | 0,005 |
| CYP3A5 substrate | 0,801 | 0,006 |
| Cholesterol oxidase inhibitor | 0,789 | 0,001 |
| CYP2J2 substrate | 0,800 | 0,013 |
| Protein-disulfide reductase (glutathione) inhibitor | 0,796 | 0,010 |
| N-(long-chain-acyl)ethanolamine deacylase inhibitor | 0,788 | 0,002 |
| Glucan endo-1,3-beta-D-glucosidase inhibitor | 0,788 | 0,005 |
| Peptidoglycan glycosyltransferase inhibitor | 0,780 | 0,002 |
| Cholesterol synthesis inhibitor | 0,778 | 0,000 |
| Antieczematic | 0,796 | 0,019 |
| Trans-1,2-dihydrobenzene-1,2-diol dehydrogenase inhibitor | 0,769 | 0,003 |
| Antipruritic | 0,762 | 0,005 |
| Dermatologic | 0,759 | 0,005 |
| Immunosuppressant | 0,762 | 0,009 |
| Glyceryl-ether monooxygenase inhibitor | 0,749 | 0,008 |
| HMOX1 expression enhancer | 0,745 | 0,005 |
| CYP2C19 substrate | 0,744 | 0,005 |
| UGT2B4 substrate | 0,736 | 0,002 |
| Alcohol O-acetyltransferase inhibitor | 0,729 | 0,004 |
| UGT1A8 substrate | 0,725 | 0,003 |
| Cycloartenol synthase inhibitor | 0,717 | 0,001 |
| UGT2B7 substrate | 0,7160,716 | 0,002 |
| Bone diseases treatment | 0,718 | 0,005 |
| Plasmanylethanolamine desaturase inhibitor | 0,716 | 0,003 |
| Mucomembranous protector | 0,744 | 0,037 |
| CYP2C12 substrate | 0,753 | 0,047 |
| Prostate disorders treatment | 0,708 | 0,006 |
| Antiosteoporotic | 0,706 | 0,005 |
| Lipoprotein lipase inhibitor | 0,703 | 0,013 |
